# Supplementary material
Source: ML conference proceedings conference paper supplement (https://proceedings.mlr.press/v222/yu24a.html)
Supplement: Supplementary file 1 [file yu24a-supp.pdf]

# Supplementary Material: A Multi-Surrogate Assisted Salp Swarm Feature Selection Algorithm with Multi-Population Adaptive Generation Strategy for Classification

**Zikang Yu**

YUZIKANG@HRBEU.EDU.CN

**Hongbin Dong** <sup>✉</sup>

DONGHONGBIN@HRBEU.EDU.CN

**Tianyu Guo**

NOCHILI@HRBEU.EDU.CN

*Department of Computer Science and Technology, Harbin Engineering University, China*

**Bingxu Zhao**

ZBX\_HEU@HRBEU.EDU.CN

*University of Victoria*

**Editors:** Berrin Yanıkoğlu and Wray Buntine

Table 1: The average classification balanced accuracy of MSA-MPSSA with different  $a$  in high-dimensional datasets

| Dataset     | $a=0.1$       | $a=0.2$       | $a=0.3$       | $a=0.4$       | $a=0.5$       |
|-------------|---------------|---------------|---------------|---------------|---------------|
| Yale        | 0.7103        | 0.7126        | <b>0.7169</b> | 0.7156        | 0.7132        |
| warpPIE10P  | 0.9721        | 0.9688        | <b>0.9774</b> | 0.9739        | 0.9755        |
| lymphoma2   | 0.9677        | 0.9718        | 0.9721        | <b>0.9742</b> | 0.9734        |
| Breast3     | <b>0.7583</b> | 0.7529        | 0.7539        | 0.7549        | 0.7463        |
| Nci         | 0.8621        | <b>0.8649</b> | 0.8602        | 0.8587        | 0.8576        |
| Leukemia1   | 1             | 1             | <b>1</b>      | 1             | 1             |
| 9_Tumors    | 0.6853        | 0.6821        | 0.6809        | 0.6878        | <b>0.6893</b> |
| Lung_Cancer | 0.9779        | 0.9803        | <b>0.9825</b> | 0.9816        | 0.9819        |

$a$  is set to 0.3.

Table 2: The average classification balanced accuracy of MSA-MPSSA at different  $b$ 

| Dataset     | $b=0.1$       | $b=0.2$       | $b=0.3$       | $b=0.4$       | $b=0.5$       |
|-------------|---------------|---------------|---------------|---------------|---------------|
| HeartEW     | 0.8846        | <b>0.8873</b> | 0.8853        | 0.8793        | 0.8768        |
| SpectEW     | 0.8428        | 0.8410        | <b>0.8469</b> | 0.8472        | 0.8323        |
| Horse       | 0.8377        | 0.8449        | <b>0.8453</b> | 0.8416        | 0.8386        |
| flags       | 0.6286        | <b>0.6360</b> | 0.6267        | 0.6332        | 0.6245        |
| BreastEW    | 0.9628        | 0.9649        | 0.9653        | 0.9686        | <b>0.9721</b> |
| ionosphere  | 0.9387        | <b>0.9400</b> | 0.9361        | 0.9350        | 0.9372        |
| Sonar       | 0.9084        | 0.9107        | <b>0.9203</b> | 0.9152        | 0.8976        |
| PenglungEW  | <b>0.9552</b> | 0.9545        | 0.9534        | 0.9428        | 0.9481        |
| Yale        | 0.7096        | 0.7169        | 0.7132        | <b>0.7192</b> | 0.7149        |
| warpPIE10P  | 0.9630        | <b>0.9774</b> | 0.9686        | 0.9753        | 0.9764        |
| lymphoma2   | <b>0.9731</b> | 0.9721        | 0.9659        | 0.9662        | 0.9703        |
| Breast3     | 0.7496        | 0.7539        | 0.7548        | 0.7563        | <b>0.7574</b> |
| Nci         | 0.8532        | <b>0.8602</b> | 0.8571        | 0.8567        | 0.8493        |
| Leukemia1   | 0.9998        | <b>1.0000</b> | <b>1.0000</b> | 0.9994        | <b>1.0000</b> |
| 9_Tumors    | 0.6823        | 0.6809        | <b>0.6854</b> | 0.6848        | 0.6789        |
| Lung_Cancer | 0.9804        | <b>0.9825</b> | 0.9786        | 0.9742        | 0.9685        |

$b$  is set to 0.2.
